# Supplementary material for: Do Reef Fish Habituate to Diver Presence? Evidence from Two Reef Sites with Contrasting Historical Levels of SCUBA Intensity in the Bay Islands, Honduras
Source: PubMed Central journal article supplement (PMC4373863; doi:10.1371/journal.pone.0119645), 2015-03-25
Supplement: pone.0119645.s001.pdf [file pone.0119645.s001.pdf]

## Cleaning Rate Diver vs Video

| Reef Site | ID  | Diver/Video/Ambient | Cleans/20min |
|-----------|-----|---------------------|--------------|
| CCMPA     | 93  | Diver               | 1            |
| CCMPA     | 90  | Diver               | 0            |
| CCMPA     | 91  | Diver               | 0            |
| CCMPA     | 92  | Diver               | 0            |
| CCMPA     | 73  | Diver               | 0            |
| CCMPA     | 72  | Diver               | 0            |
| CCMPA     | 77  | Diver               | 0            |
| CCMPA     | 97  | Diver               | 0            |
| CCMPA     | 13  | Diver               | 0            |
| CCMPA     | 96  | Diver               | 1            |
| CCMPA     | 74  | Diver               | 0            |
| CCMPA     | 78  | Diver               | 0            |
| CCMPA     | 64  | Diver               | 0            |
| CCMPA     | 6   | Diver               | 0            |
| CCMPA     | 65  | Diver               | 0            |
| CCMPA     | 5   | Diver               | 1            |
| CCMPA     | 77  | Diver               | 0            |
| CCMPA     | 16  | Diver               | 0            |
| CCMPA     | 82  | Diver               | 0            |
| CCMPA     | 70  | Diver               | 0            |
| CCMPA     | 7   | Diver               | 0            |
| CCMPA     | 62  | Diver               | 0            |
| CCMPA     | 66  | Diver               | 0            |
| CCMPA     | 57  | Diver               | 0            |
| CCMPA     | 81  | Diver               | 0            |
| CCMPA     | 56  | Diver               | 0            |
| CCMPA     | 17  | Diver               | 0            |
| CCMPA     | 45  | Diver               | 0            |
| CCMPA     | 55  | Diver               | 0            |
| CCMPA     | 51  | Diver               | 0            |
| CCMPA     | 4   | Diver               | 3            |
| CCMPA     | 83  | Video               | 4            |
| CCMPA     | 84  | Video               | 0            |
| CCMPA     | 100 | Video               | 5            |
| CCMPA     | 67  | Video               | 0            |
| CCMPA     | 61  | Video               | 3            |
| CCMPA     | 79  | Video               | 0            |
| CCMPA     | 1   | Video               | 4            |
| CCMPA     | 68  | Video               | 4            |
| CCMPA     | 3   | Video               | 0            |
| CCMPA     | 15  | Video               | 2            |
| CCMPA     | 18  | Video               | 0            |
| CCMPA     | 9   | Video               | 0            |
| CCMPA     | 20  | Video               | 0            |
| CCMPA     | 69  | Video               | 1            |
| CCMPA     | 14  | Video               | 2            |

|       |           |    |
|-------|-----------|----|
| CCMPA | 45 Video  | 3  |
| CCMPA | 2 Video   | 1  |
| CCMPA | 60 Video  | 0  |
| CCMPA | 80 Video  | 4  |
| Utila | 31 Diver  | 0  |
| Utila | 21 Diver  | 0  |
| Utila | 52 Diver  | 0  |
| Utila | 33 Diver  | 0  |
| Utila | 29 Diver  | 0  |
| Utila | 53 Diver  | 1  |
| Utila | 54 Diver  | 0  |
| Utila | 1 Diver   | 1  |
| Utila | 2 Diver   | 1  |
| Utila | 101 Diver | 2  |
| Utila | 104 Diver | 4  |
| Utila | 23 Diver  | 0  |
| Utila | 59 Diver  | 0  |
| Utila | 105 Diver | 1  |
| Utila | 38 Diver  | 4  |
| Utila | 22 Diver  | 0  |
| Utila | 26 Diver  | 1  |
| Utila | 4 Diver   | 0  |
| Utila | 41 Diver  | 0  |
| Utila | 43 Diver  | 0  |
| Utila | 27 Diver  | 0  |
| Utila | 44 Diver  | 1  |
| Utila | 36 Diver  | 5  |
| Utila | 11 Diver  | 3  |
| Utila | 32 Diver  | 0  |
| Utila | 112 Diver | 0  |
| Utila | 109 Diver | 0  |
| Utila | 113 Diver | 0  |
| Utila | 34 Diver  | 0  |
| Utila | 110 Diver | 0  |
| Utila | 111 Diver | 1  |
| Utila | 12 Video  | 0  |
| Utila | 25 Video  | 1  |
| Utila | 30 Video  | 0  |
| Utila | 32 Video  | 1  |
| Utila | 3 Video   | 4  |
| Utila | 35 Video  | 3  |
| Utila | 106 Video | 0  |
| Utila | 108 Video | 1  |
| Utila | 5 Video   | 4  |
| Utila | 107 Video | 1  |
| Utila | 28 Video  | 3  |
| Utila | 102 Video | 3  |
| Utila | 103 Video | 13 |

### Cleaning Rate Ambient Diver Presence vs Video

|       | <b>ID</b> | <b>Ambient Presence</b> | <b>Diver Absence (video)</b> |   |
|-------|-----------|-------------------------|------------------------------|---|
| CCMPA | 83        |                         | 1                            | 4 |
| CCMPA | 84        |                         | 0                            | 0 |
| CCMPA | 100       |                         | 0                            | 5 |
| CCMPA | 67        |                         | 0                            | 0 |
| CCMPA | 61        |                         | 0                            | 3 |
| CCMPA | 79        |                         | 1                            | 0 |
| CCMPA | 1         |                         | 0                            | 4 |
| CCMPA | 68        |                         | 0                            | 4 |
| CCMPA | 3         |                         | 0                            | 0 |
| CCMPA | 15        |                         | 1                            | 2 |
| CCMPA | 18        |                         | 0                            | 0 |
| CCMPA | 9         |                         | 0                            | 0 |
| CCMPA | 20        |                         | 1                            | 0 |
| CCMPA | 69        |                         | 0                            | 1 |
| CCMPA | 14        |                         | 1                            | 2 |
| CCMPA | 45        |                         | 0                            | 3 |
| CCMPA | 2         |                         | 1                            | 1 |
| CCMPA | 60        |                         | 2                            | 0 |
| CCMPA | 80        |                         | 2                            | 4 |

|       | <b>ID</b> | <b>Ambient Presence</b> | <b>Diver Absence (video)</b> |    |
|-------|-----------|-------------------------|------------------------------|----|
| Utila | 12        |                         | 1                            | 0  |
| Utila | 25        |                         | 1                            | 1  |
| Utila | 30        |                         | 0                            | 0  |
| Utila | 32        |                         | 3                            | 1  |
| Utila | 3         |                         | 4                            | 4  |
| Utila | 35        |                         | 3                            | 3  |
| Utila | 106       |                         | 0                            | 0  |
| Utila | 108       |                         | 0                            | 1  |
| Utila | 5         |                         | 8                            | 4  |
| Utila | 107       |                         | 0                            | 1  |
| Utila | 28        |                         | 7                            | 3  |
| Utila | 102       |                         | 0                            | 3  |
| Utila | 103       |                         | 8                            | 13 |

### Time until first cleaning interaction from camera deployment

|       | <b>ID</b> | <b>Divers Present</b> | <b>Divers absent</b> |      |
|-------|-----------|-----------------------|----------------------|------|
| CCMPA | 83        | 23.00                 |                      | 3    |
| CCMPA | 100       | 41.00                 |                      | 4.5  |
| CCMPA | 61        | 49.50                 |                      | 8    |
| CCMPA | 79        | 3.50                  |                      | 9    |
| CCMPA | 1         | 62.00                 |                      | 20   |
| CCMPA | 68        | 28.00                 |                      | 4.66 |
| CCMPA | 3         | 135.00                |                      | 7    |

|       |    |        |      |
|-------|----|--------|------|
| CCMPA | 15 | 1.00   | 4    |
| CCMPA | 18 | 75.00  | 3    |
| CCMPA | 9  | 135.00 | 15.6 |
| CCMPA | 20 | 18.33  | 4.33 |
| CCMPA | 69 | 22.00  | 2.5  |
| CCMPA | 14 | 10.25  | 12   |
| CCMPA | 45 | 32.00  | 21   |
| CCMPA | 2  | 16.50  | 8    |

|       | <b>ID</b> | <b>Divers Present</b> | <b>Divers absent</b> |
|-------|-----------|-----------------------|----------------------|
| Utila | <u>12</u> | 25.33                 | 2                    |
| Utila | 25        | 19.75                 | 12                   |
| Utila | 32        | 15                    | 1                    |
| Utila | 3         | 6.75                  | 13                   |
| Utila | 35        | 9                     | 16                   |
| Utila | 108       | 45                    | 42                   |
| Utila | 5         | 1                     | 8                    |
| Utila | 107       | 71                    | 8                    |
| Utila | 28        | 2                     | 13                   |
| Utila | 102       | 33                    | 19                   |
| Utila | 103       | 4                     | 4                    |
